# Supplementary material for: Identification and expression responses of TCP gene family in Opisthopappus taihangensis under abiotic stress
Source: Frontiers journal article supplement (doi:10.3389/fpls.2025.1499244), 2025-03-06
Supplement: Data_Sheet_1.pdf [file Data_Sheet_1.pdf]

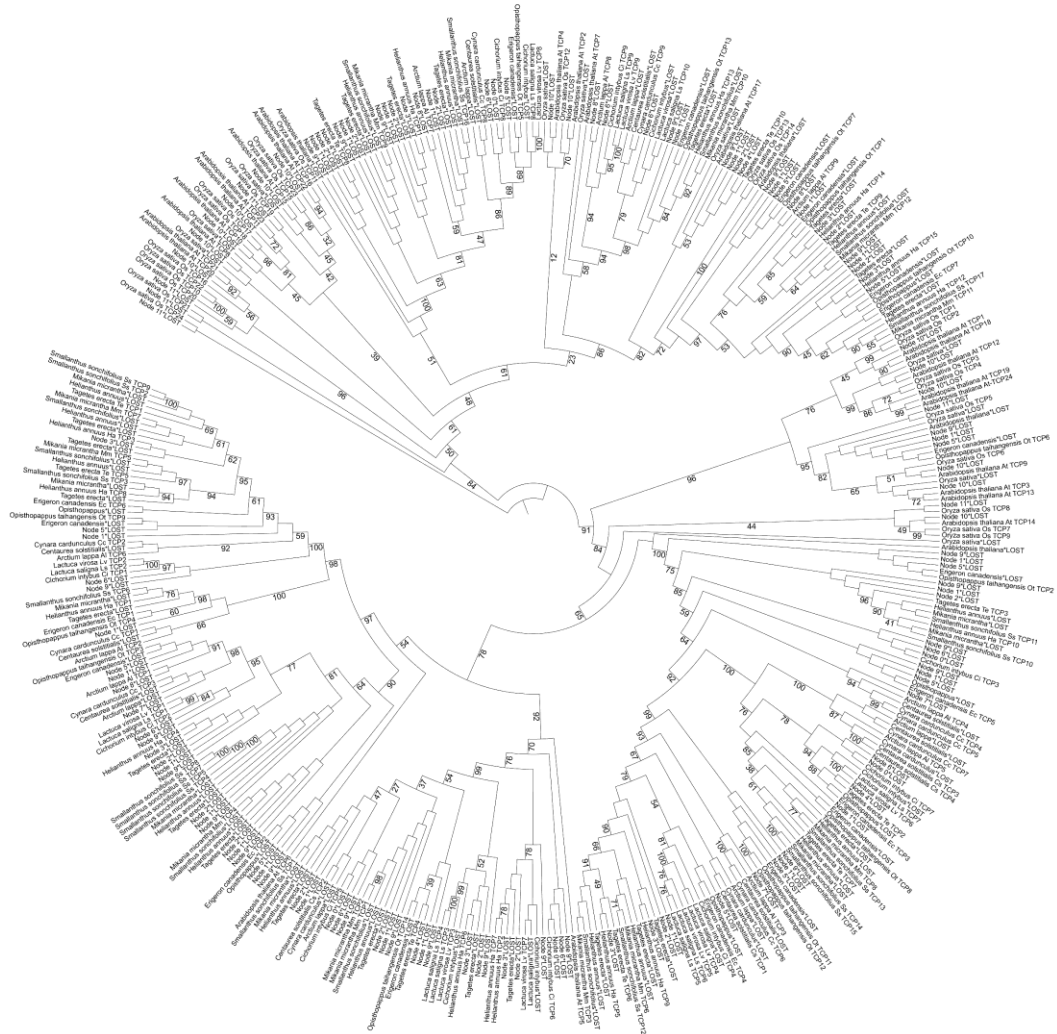

Figure S1: The reconstruction of the gene tree to show the gene gain and lost of TCPs in Asteraceae. The number around the nodes represented bootstrap value with 1000 times replications.

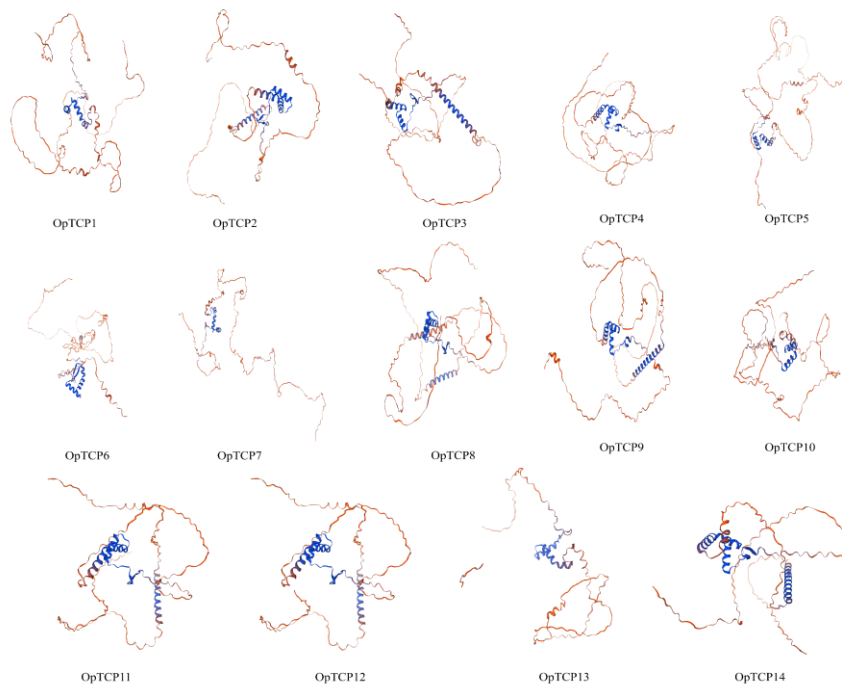

Figure S2: Structural analysis of the tertiary structure of OtTCP genes. Blue indicates consistency greater than 70%, red indicates less than 50%, and yellow indicates consistency between 60%-70%.
