# Supplementary material for: Identification and expression responses of TCP gene family in Opisthopappus taihangensis under abiotic stress
Source: Front Plant Sci. 2025 Mar 6;16:1499244. doi: 10.3389/fpls.2025.1499244 (PMC11922953; doi:10.3389/fpls.2025.1499244)
Supplement: Supplementary file 2 [file Table1.xlsx]

## Sheet: Table S1
Table S1. Information of primer sequences
Gene ID	Primer sequences	Length/bp
OtTCP-13F	ATGGAAAATGATCACCAAAAC	21
OtTCP-13R	CTAAGAGTGGCTGCTACTA	19
OtTCP-6F	ATGGAGGAAGATTTTAACTACAA	23
OtTCP-6R	TCAATGGTGAGAATCCGAG	19
OtTCP-7F	ATGGATGGTAGTCATGATCAT	21
OtTCP-7R	TTACGAGTGGTGGCTTGTTG	20
OtTCP-10F	ATGGATGGTGGTGATGATCA	20
OtTCP-10R	TCACGACTGATGGCTAGTT	19
Actin1-F	CCTACAACGCCACACTCTCA	20
Actin1-R	ACAGCAAGTTACACCACTCATG	22
Actin2-F	AGGTTGCCAGTTGTGATTCCA	21
Actin2-R	GGCTTCTCCGCAGCATTCT	19

## Sheet: Table S2
Table S2. Ka/Ks ratios of segmental duplication gene pairs in Opisthopappus taihangensis .
Seq_1	Seq_2	Ka	Ks	Ka_Ks
OtTCP3	OtTCP9	0.385413	1.43752	0.268109
OtTCP2	OtTCP11	0.372403	1.09806	0.339145
OtTCP8	OtTCP11	0.355209	0.933834	0.380377
Table S2. Ka/Ks ratios of tandem duplication gene pairs in Opisthopappus taihangensis .
Seq_1	Seq_2	Ka	Ks	Ka_Ks
OtTCP3	OtTCP4	0.438270460933514	1.3791751919103445	0.31777722185275825

## Sheet: Table S3
Table S3. One-to-one orthologous relationships between Opisthopappus taihangensis and Helianthus annuus
OtTCP2Gene ID	Chr		HaC2H2 Gene ID	Chr
OtTCP6	Chr3		transcript:mRNA:HanXRQr2_Chr11g0476721	11
OtTCP3	Chr1		transcript:mRNA:HanXRQr2_Chr12g0535431	12
OtTCP6	Chr3		transcript:mRNA:HanXRQr2_Chr12g0545741	12
OtTCP14	Chr9		transcript:mRNA:HanXRQr2_Chr15g0683591	15
OtTCP3	Chr1		transcript:mRNA:HanXRQr2_Chr16g0773741	16
OtTCP2	Chr1		transcript:mRNA:HanXRQr2_Chr16g0727981	16
OtTCP9	Chr5		transcript:mRNA:HanXRQr2_Chr16g0773741	16
OtTCP12	Chr6		transcript:mRNA:HanXRQr2_Chr16g0727981	16
OtTCP3	Chr1		transcript:mRNA:HanXRQr2_Chr17g0827991	17
OtTCP9	Chr5		transcript:mRNA:HanXRQr2_Chr17g0827991	17
OtTCP8	Chr4		transcript:mRNA:HanXRQr2_Chr04g0155191	4
OtTCP1	Chr1		transcript:mRNA:HanXRQr2_Chr05g0230911	5
OtTCP2	Chr1		transcript:mRNA:HanXRQr2_Chr05g0223571	5
OtTCP8	Chr4		transcript:mRNA:HanXRQr2_Chr05g0223571	5
OtTCP1	Chr1		transcript:mRNA:HanXRQr2_Chr08g0356251	8
OtTCP2	Chr1		transcript:mRNA:HanXRQr2_Chr09g0407691	9
OtTCP8	Chr4		transcript:mRNA:HanXRQr2_Chr09g0407691	9
OtTCP7	Chr4		transcript:mRNA:HanXRQr2_Chr09g0409091	9
OtTCP10	Chr6		transcript:mRNA:HanXRQr2_Chr09g0409091	9
OtTCP11	Chr6		transcript:mRNA:HanXRQr2_Chr09g0407691	9
OtTCP5	Chr2		transcript:mRNA:HanXRQr2_Chr10g0441741	10
OtTCP6	Chr3		transcript:mRNA:HanXRQr2_Chr10g0450321	10
Table S3. One-to-one orthologous relationships between Opisthopappus taihangensis and Arabidopsis thaliana
OtTCPGene ID	Chr		AtC2H2 Gene ID	Chr
OtTCP6	Chr3		rna-NM_001338148.1	NC_003074.8
OtTCP7	Chr4		rna-NM_114630.4	NC_003074.8
OtTCP9	Chr5		rna-NM_001334381.1	NC_003070.9
Table S3. One-to-one orthologous relationships between Opisthopappus taihangensis and Tagetes erecta
OtTCPGene ID	Chr		TeC2H2 Gene ID	Chr
OtTCP3	Chr1		rna-gnl|WGS:JAUHHV|QVD17_mrna29179	CM061492.1
OtTCP5	Chr2		rna-gnl|WGS:JAUHHV|QVD17_mrna26828	CM061492.1
OtTCP6	Chr3		rna-gnl|WGS:JAUHHV|QVD17_mrna25832	CM061492.1
OtTCP2	Chr1		rna-gnl|WGS:JAUHHV|QVD17_mrna25267	CM061491.1
OtTCP12	Chr6		rna-gnl|WGS:JAUHHV|QVD17_mrna25267	CM061491.1
OtTCP3	Chr1		rna-gnl|WGS:JAUHHV|QVD17_mrna20963	CM061490.1
OtTCP9	Chr5		rna-gnl|WGS:JAUHHV|QVD17_mrna20963	CM061490.1
OtTCP2	Chr1		rna-gnl|WGS:JAUHHV|QVD17_mrna39040	CM061496.1
OtTCP8	Chr4		rna-gnl|WGS:JAUHHV|QVD17_mrna39040	CM061496.1
OtTCP9	Chr5		rna-gnl|WGS:JAUHHV|QVD17_mrna33066	CM061494.1
OtTCP8	Chr4		rna-gnl|WGS:JAUHHV|QVD17_mrna15943	CM061489.1
OtTCP7	Chr4		rna-gnl|WGS:JAUHHV|QVD17_mrna10655	CM061487.1
OtTCP10	Chr6		rna-gnl|WGS:JAUHHV|QVD17_mrna10655	CM061487.1
OtTCP1	Chr1		rna-gnl|WGS:JAUHHV|QVD17_mrna01574	CM061486.1
OtTCP6	Chr3		rna-gnl|WGS:JAUHHV|QVD17_mrna05446	CM061486.1
OtTCP8	Chr4		rna-gnl|WGS:JAUHHV|QVD17_mrna02294	CM061486.1
OtTCP13	Chr9		rna-gnl|WGS:JAUHHV|QVD17_mrna03541	CM061486.1
Table S3. One-to-one orthologous relationships between Opisthopappus taihangensis and Centaurea solstitialis
OtTCP2Gene ID	Chr		CsC2H2 Gene ID	Chr
OtTCP2	Chr1		rna-gnl|WGS:JARYMX|ANN12998-RA	CM058040.1
OtTCP8	Chr4		rna-gnl|WGS:JARYMX|ANN05638-RA	CM058041.1
OtTCP12	Chr6		rna-gnl|WGS:JARYMX|ANN12998-RA	CM058040.1
OtTCP14	Chr9		rna-gnl|WGS:JARYMX|ANN09738-RA	CM058040.1
OtTCP14	Chr9		rna-gnl|WGS:JARYMX|ANN09699-RA	CM058040.1
Table S3. One-to-one orthologous relationships between Opisthopappus taihangensis and Arctium lappa
OtTCP2Gene ID	Chr		AlC2H2 Gene ID	Chr
OtTCP2	Chr1		rna-gnl|WGS:JAKOEK|L6452_mrna06850	CM042048.1
OtTCP2	Chr1		rna-gnl|WGS:JAKOEK|L6452_mrna34172	CM042058.1
OtTCP2	Chr1		rna-gnl|WGS:JAKOEK|L6452_mrna39400	CM042061.1
OtTCP1	Chr1		rna-gnl|WGS:JAKOEK|L6452_mrna39543	CM042061.1
OtTCP5	Chr2		rna-gnl|WGS:JAKOEK|L6452_mrna22599	CM042053.1
OtTCP6	Chr3		rna-gnl|WGS:JAKOEK|L6452_mrna00406	CM042047.1
OtTCP7	Chr3		rna-gnl|WGS:JAKOEK|L6452_mrna23426	CM042053.1
OtTCP8	Chr3		rna-gnl|WGS:JAKOEK|L6452_mrna28555	CM042055.1
OtTCP7	Chr4		rna-gnl|WGS:JAKOEK|L6452_mrna07040	CM042048.1
OtTCP8	Chr4		rna-gnl|WGS:JAKOEK|L6452_mrna06850	CM042048.1
OtTCP8	Chr4		rna-gnl|WGS:JAKOEK|L6452_mrna34172	CM042058.1
OtTCP7	Chr4		rna-gnl|WGS:JAKOEK|L6452_mrna34355	CM042058.1
OtTCP8	Chr4		rna-gnl|WGS:JAKOEK|L6452_mrna39400	CM042061.1
OtTCP7	Chr4		rna-gnl|WGS:JAKOEK|L6452_mrna39543	CM042061.1
OtTCP9	Chr5		rna-gnl|WGS:JAKOEK|L6452_mrna13473	CM042050.1
OtTCP9	Chr5		rna-gnl|WGS:JAKOEK|L6452_mrna20880	CM042052.1
OtTCP14	Chr6		rna-gnl|WGS:JAKOEK|L6452_mrna06850	CM042048.1
OtTCP10	Chr6		rna-gnl|WGS:JAKOEK|L6452_mrna07040	CM042048.1
OtTCP11	Chr6		rna-gnl|WGS:JAKOEK|L6452_mrna06850	CM042048.1
OtTCP12	Chr6		rna-gnl|WGS:JAKOEK|L6452_mrna34172	CM042058.1
OtTCP13	Chr6		rna-gnl|WGS:JAKOEK|L6452_mrna39400	CM042061.1
OtTCP14	Chr9		rna-gnl|WGS:JAKOEK|L6452_mrna44402	CM042064.1
Table S3. One-to-one orthologous relationships between Opisthopappus taihangensis and Cynara cardunculus
OtTCP2Gene ID	Chr		CcC2H2 Gene ID	Chr
OtTCP2	Chr1		rna-XM_025115558.1	NC_037530.1
OtTCP2	Chr1		rna-XM_025119164.1	NC_037532.1
OtTCP1	Chr1		rna-XM_025121562.1	NC_037533.1
OtTCP5	Chr2		rna-XM_025124435.1	NC_037535.1
OtTCP6	Chr3		rna-XM_025111580.1	NC_037529.1
OtTCP6	Chr3		rna-XM_025124927.1	NC_037535.1
OtTCP8	Chr4		rna-XM_025115558.1	NC_037530.1
OtTCP7	Chr4		rna-XM_025121562.1	NC_037533.1
OtTCP10	Chr6		rna-XM_025115390.1	NC_037530.1
OtTCP11	Chr6		rna-XM_025115558.1	NC_037530.1
OtTCP10	Chr6		rna-XM_025139513.1	NC_037542.1
OtTCP14	Chr9		rna-XM_025119164.1	NC_037532.1
OtTCP14	Chr9		rna-XM_025119155.1	NC_037532.1
OtTCP13	Chr9		rna-XM_025139513.1	NC_037542.1
Table S3. One-to-one orthologous relationships between Opisthopappus taihangensis and Erigeron canadensis
OtTCP2Gene ID	Chr		EcC2H2 Gene ID	Chr
OtTCP2	Chr1		rna-XM_043760380.1	NC_057762.1
OtTCP1	Chr1		rna-XM_043761212.1	NC_057762.1
OtTCP2	Chr1		rna-XM_043783595.1	NC_057768.1
OtTCP1	Chr1		rna-XM_043750722.1	NC_057768.1
OtTCP5	Chr2		rna-XM_043770771.1	NC_057764.1
OtTCP6	Chr3		rna-XM_043765838.1	NC_057763.1
OtTCP6	Chr3		rna-XM_043767725.1	NC_057764.1
OtTCP6	Chr3		rna-XM_043773056.1	NC_057765.1
OtTCP7	Chr4		rna-XM_043761212.1	NC_057762.1
OtTCP8	Chr4		rna-XM_043760380.1	NC_057762.1
OtTCP8	Chr4		rna-XM_043781263.1	NC_057767.1
OtTCP7	Chr4		rna-XM_043750722.1	NC_057768.1
OtTCP9	Chr5		rna-XM_043764302.1	NC_057761.1
OtTCP9	Chr5		rna-XM_043770871.1	NC_057764.1
OtTCP10	Chr6		rna-XM_043761212.1	NC_057762.1
OtTCP12	Chr6		rna-XM_043760380.1	NC_057762.1
OtTCP14	Chr9		rna-XM_043752545.1	NC_057768.1
Table S3. One-to-one orthologous relationships between Opisthopappus taihangensis and Lactuca saligna
OtTCP2Gene ID	Chr		LsC2H2 Gene ID	Chr
OtTCP2	Chr1		rna-LSALG_LOCUS7413	OX465077.1
OtTCP2	Chr1		rna-LSALG_LOCUS21277	OX465080.1
OtTCP1	Chr1		rna-LSALG_LOCUS23501	OX465081.1
OtTCP5	Chr2		rna-LSALG_LOCUS26594	OX465081.1
OtTCP6	Chr3		rna-LSALG_LOCUS42178	OX465085.1
OtTCP8	Chr4		rna-LSALG_LOCUS7413	OX465077.1
OtTCP8	Chr4		rna-LSALG_LOCUS21277	OX465080.1
OtTCP7	Chr4		rna-LSALG_LOCUS23501	OX465081.1
OtTCP9	Chr5		rna-LSALG_LOCUS18497	OX465080.1
OtTCP9	Chr5		rna-LSALG_LOCUS35574	OX465084.1
OtTCP11	Chr6		rna-LSALG_LOCUS7413	OX465077.1
OtTCP12	Chr6		rna-LSALG_LOCUS21277	OX465080.1
OtTCP10	Chr6		rna-LSALG_LOCUS21105	OX465080.1
OtTCP14	Chr9		rna-LSALG_LOCUS16777-2	OX465079.1
OtTCP13	Chr9		rna-LSALG_LOCUS15883	OX465079.1
Table S3. One-to-one orthologous relationships between Opisthopappus taihangensis and Lactuca virosa
OtTCP2Gene ID	Chr		LvC2H2 Gene ID	Chr
OtTCP1	Chr1		rna-LVIROSA_LOCUS15308	CAKMRJ010002223.1
OtTCP2	Chr1		rna-LVIROSA_LOCUS28845	CAKMRJ010005412.1
OtTCP5	Chr2		rna-LVIROSA_LOCUS13377	CAKMRJ010002223.1
OtTCP6	Chr3		rna-LVIROSA_LOCUS12845	CAKMRJ010002223.1
OtTCP6	Chr3		rna-LVIROSA_LOCUS30385	CAKMRJ010005523.1
OtTCP7	Chr4		rna-LVIROSA_LOCUS15308	CAKMRJ010002223.1
OtTCP8	Chr4		rna-LVIROSA_LOCUS28845	CAKMRJ010005412.1
OtTCP12	Chr6		rna-LVIROSA_LOCUS9677-2	CAKMRJ010001112.1
OtTCP11	Chr6		rna-LVIROSA_LOCUS28845	CAKMRJ010005412.1
Table S3. One-to-one orthologous relationships between Opisthopappus taihangensis and Smallanthus sonchifolius
OtTCP2Gene ID	Chr		SsC2H2 Gene ID	Chr
OtTCP1	Chr1		rna-gnl|WGS:JAKNSE|L1987_mrna07196	CM042019.1
OtTCP2	Chr1		rna-gnl|WGS:JAKNSE|L1987_mrna08509	CM042020.1
OtTCP1	Chr1		rna-gnl|WGS:JAKNSE|L1987_mrna08369	CM042020.1
OtTCP4	Chr1		rna-gnl|WGS:JAKNSE|L1987_mrna16185	CM042022.1
OtTCP1	Chr1		rna-gnl|WGS:JAKNSE|L1987_mrna44829	CM042031.1
OtTCP2	Chr1		rna-gnl|WGS:JAKNSE|L1987_mrna47281	CM042032.1
OtTCP4	Chr1		rna-gnl|WGS:JAKNSE|L1987_mrna62823	CM042038.1
OtTCP1	Chr1		rna-gnl|WGS:JAKNSE|L1987_mrna66701	CM042039.1
OtTCP2	Chr1		rna-gnl|WGS:JAKNSE|L1987_mrna66617	CM042039.1
OtTCP1	Chr1		rna-gnl|WGS:JAKNSE|L1987_mrna69587	CM042040.1
OtTCP1	Chr1		rna-gnl|WGS:JAKNSE|L1987_mrna80172	CM042044.1
OtTCP2	Chr1		rna-gnl|WGS:JAKNSE|L1987_mrna80298	CM042044.1
OtTCP5	Chr2		rna-gnl|WGS:JAKNSE|L1987_mrna32080	CM042027.1
OtTCP5	Chr2		rna-gnl|WGS:JAKNSE|L1987_mrna49006	CM042033.1
OtTCP6	Chr3		rna-gnl|WGS:JAKNSE|L1987_mrna14691	CM042022.1
OtTCP6	Chr3		rna-gnl|WGS:JAKNSE|L1987_mrna19191	CM042024.1
OtTCP6	Chr3		rna-gnl|WGS:JAKNSE|L1987_mrna31670	CM042027.1
OtTCP6	Chr3		rna-gnl|WGS:JAKNSE|L1987_mrna49516	CM042033.1
OtTCP6	Chr3		rna-gnl|WGS:JAKNSE|L1987_mrna70646	CM042041.1
OtTCP6	Chr3		rna-gnl|WGS:JAKNSE|L1987_mrna84599	CM042046.1
OtTCP8	Chr4		rna-gnl|WGS:JAKNSE|L1987_mrna08509	CM042020.1
OtTCP8	Chr4		rna-gnl|WGS:JAKNSE|L1987_mrna14022	CM042021.1
OtTCP8	Chr4		rna-gnl|WGS:JAKNSE|L1987_mrna23299	CM042025.1
OtTCP7	Chr4		rna-gnl|WGS:JAKNSE|L1987_mrna44829	CM042031.1
OtTCP8	Chr4		rna-gnl|WGS:JAKNSE|L1987_mrna53184	CM042034.1
OtTCP8	Chr4		rna-gnl|WGS:JAKNSE|L1987_mrna64461	CM042038.1
OtTCP7	Chr4		rna-gnl|WGS:JAKNSE|L1987_mrna66701	CM042039.1
OtTCP8	Chr4		rna-gnl|WGS:JAKNSE|L1987_mrna80298	CM042044.1
OtTCP9	Chr5		rna-gnl|WGS:JAKNSE|L1987_mrna12136	CM042021.1
OtTCP9	Chr5		rna-gnl|WGS:JAKNSE|L1987_mrna38869	CM042029.1
OtTCP9	Chr5		rna-gnl|WGS:JAKNSE|L1987_mrna57364	CM042036.1
OtTCP9	Chr5		rna-gnl|WGS:JAKNSE|L1987_mrna62823	CM042038.1
OtTCP10	Chr6		rna-gnl|WGS:JAKNSE|L1987_mrna44829	CM042031.1
OtTCP11	Chr6		rna-gnl|WGS:JAKNSE|L1987_mrna44747	CM042031.1
OtTCP12	Chr6		rna-gnl|WGS:JAKNSE|L1987_mrna47281	CM042032.1
OtTCP12	Chr6		rna-gnl|WGS:JAKNSE|L1987_mrna51657	CM042034.1
OtTCP10	Chr6		rna-gnl|WGS:JAKNSE|L1987_mrna66701	CM042039.1
OtTCP11	Chr6		rna-gnl|WGS:JAKNSE|L1987_mrna66617	CM042039.1
Table S3. One-to-one orthologous relationships between Opisthopappus taihangensis and Mikania micrantha
OtTCP2Gene ID	Chr		MmC2H2 Gene ID	Chr
OtTCP2	Chr1		rna-gnl|WGS:SZYD|E3N88_mrna20925	CM018690.1
OtTCP1	Chr1		rna-gnl|WGS:SZYD|E3N88_mrna21008	CM018690.1
OtTCP5	Chr2		rna-gnl|WGS:SZYD|E3N88_mrna06382	CM018682.1
OtTCP6	Chr3		rna-gnl|WGS:SZYD|E3N88_mrna05399	CM018682.1
OtTCP6	Chr3		rna-gnl|WGS:SZYD|E3N88_mrna34670	CM018696.1
OtTCP8	Chr4		rna-gnl|WGS:SZYD|E3N88_mrna10516	CM018684.1
OtTCP7	Chr4		rna-gnl|WGS:SZYD|E3N88_mrna21008	CM018690.1
OtTCP9	Chr5		rna-gnl|WGS:SZYD|E3N88_mrna03958	CM018681.1
OtTCP9	Chr5		rna-gnl|WGS:SZYD|E3N88_mrna19685	CM018689.1
OtTCP10	Chr6		rna-gnl|WGS:SZYD|E3N88_mrna21008	CM018690.1
OtTCP12	Chr6		rna-gnl|WGS:SZYD|E3N88_mrna20925	CM018690.1
OtTCP12	Chr6		rna-gnl|WGS:SZYD|E3N88_mrna39295	CM018697.1
OtTCP11	Chr6		rna-gnl|WGS:SZYD|E3N88_mrna39295	CM018697.1
Table S3. One-to-one orthologous relationships between Opisthopappus taihangensis and Cichorium intybus
OtTCP2Gene ID	Chr		CiC2H2 Gene ID	Chr
OtTCP2	Chr1		rna-gnl|WGS:JAKNSD|L2E82_mrna17092	CM042011.1
OtTCP2	Chr1		rna-gnl|WGS:JAKNSD|L2E82_mrna46725	CM042017.1
OtTCP1	Chr1		rna-gnl|WGS:JAKNSD|L2E82_mrna46585	CM042017.1
OtTCP5	Chr2		rna-gnl|WGS:JAKNSD|L2E82_mrna01652	CM042009.1
OtTCP6	Chr3		rna-gnl|WGS:JAKNSD|L2E82_mrna02350	CM042009.1
OtTCP6	Chr3		rna-gnl|WGS:JAKNSD|L2E82_mrna37501	CM042015.1
OtTCP7	Chr4		rna-gnl|WGS:JAKNSD|L2E82_mrna16891	CM042011.1
OtTCP8	Chr4		rna-gnl|WGS:JAKNSD|L2E82_mrna17092	CM042011.1
OtTCP7	Chr4		rna-gnl|WGS:JAKNSD|L2E82_mrna26790	CM042013.1
OtTCP8	Chr4		rna-gnl|WGS:JAKNSD|L2E82_mrna26914	CM042013.1
OtTCP7	Chr4		rna-gnl|WGS:JAKNSD|L2E82_mrna46585	CM042017.1
OtTCP9	Chr5		rna-gnl|WGS:JAKNSD|L2E82_mrna08279	CM042010.1
OtTCP9	Chr5		rna-gnl|WGS:JAKNSD|L2E82_mrna13901	CM042011.1
OtTCP12	Chr6		rna-gnl|WGS:JAKNSD|L2E82_mrna17092	CM042011.1
OtTCP10	Chr6		rna-gnl|WGS:JAKNSD|L2E82_mrna16891	CM042011.1
OtTCP10	Chr6		rna-gnl|WGS:JAKNSD|L2E82_mrna42899	CM042016.1
OtTCP13	Chr9		rna-gnl|WGS:JAKNSD|L2E82_mrna42899	CM042016.1
OtTCP14	Chr9		rna-gnl|WGS:JAKNSD|L2E82_mrna44096	CM042016.1
Table S3. One-to-one orthologous relationships between Opisthopappus taihangensis and Oryza sativa
OtTCP2Gene ID	Chr		OsC2H2 Gene ID	Chr

## Sheet: Table S4
Table S4. Secondary structure and tertiary homology modeling prediction of enzymatic antioxidant gene proteins in Opisthopappus taihangensis .
Gene Name	Alpha helix	Extended strand	Beta turn	Random coil
OpTCP1	0.1823	0.1406	0.0443	0.6328
OpTCP2	0.3403	0.0836	0.0119	0.5642
OpTCP3	0.3125	0.1432	0.0208	0.5234
OpTCP4	0.2462	0.1231	0.0205	0.0205
OpTCP5	0.1972	0.0986	0.0399	0.6643
OpTCP6	0.1227	0.1227	0.0213	0.7333
OpTCP7	0.1995	0.1223	0.0372	0.641
OpTCP8	0.2872	0.1159	0.0126	0.5844
OpTCP9	0.2617	0.0984	0.013	0.6269
OpTCP10	0.1595	0.1081	0.0378	0.6946
OpTCP11	0.3373	0.0955	0.0179	0.5493
OpTCP12	0.3208	0.0881	0.0283	0.5629
OpTCP13	0.1328	0.166	0.0913	0.61
OpTCP14	0.2997	0.1481	0.0135	0.5387

## Sheet: Table S5
Table S5. Cis-element Prediction of the OtTCP.
Gene ID	Start position(bp)	End position(bp)	Cis-element
OtTCP3	297	344	P-box
OtTCP3	588	635	GARE-motif
OtTCP3	1404	1451	GARE-motif
OtTCP3	46	92	LTR
OtTCP3	1059	1105	LTR
OtTCP3	511	556	CGTCA-motif
OtTCP3	999	1044	CGTCA-motif
OtTCP3	845	891	Box 4
OtTCP3	1864	1910	Box 4
OtTCP3	511	556	TGACG-motif
OtTCP3	999	1044	TGACG-motif
OtTCP3	1358	1404	ARE
OtTCP3	418	464	TGA-element
OtTCP3	179	224	ABRE
OtTCP3	1780	1826	ABRE
OtTCP3	1781	1826	ABRE
OtTCP3	1276	1322	MBS
OtTCP3	1718	1765	GATA-motif
OtTCP3	19	65	MYC
OtTCP3	600	646	MYC
OtTCP3	794	840	MYC
OtTCP3	122	168	GT1-motif
OtTCP3	580	627	GT1-motif
OtTCP3	581	627	GT1-motif
OtTCP3	616	663	GT1-motif
OtTCP3	941	987	GT1-motif
OtTCP3	1626	1672	GT1-motif
OtTCP4	170	216	MYC
OtTCP4	617	663	MYC
OtTCP4	1292	1338	MYC
OtTCP4	1483	1529	MYC
OtTCP4	1504	1550	MYC
OtTCP4	143	189	TCT-motif
OtTCP4	322	368	MBS
OtTCP4	665	711	MBS
OtTCP4	26	71	ABRE
OtTCP4	810	855	ABRE
OtTCP4	1946	1992	ARE
OtTCP4	6	52	TGA-element
OtTCP4	725	771	TGA-element
OtTCP4	1064	1110	TGA-element
OtTCP4	1258	1304	TGA-element
OtTCP4	1567	1616	TC-rich repeats
OtTCP4	180	228	AE-box
OtTCP4	809	858	O2-site
OtTCP4	812	857	TGACG-motif
OtTCP4	269	315	Box 4
OtTCP4	291	337	Box 4
OtTCP4	812	857	CGTCA-motif
OtTCP4	-14	33	P-box
OtTCP4	821	867	GT1-motif
OtTCP1	497	543	MYC
OtTCP1	607	653	MYC
OtTCP1	1800	1846	MYC
OtTCP1	1972	2018	MYC
OtTCP1	1784	1833	GATA-motif
OtTCP1	1576	1621	ABRE
OtTCP1	1360	1406	ARE
OtTCP1	771	817	TGA-element
OtTCP1	186	234	AE-box
OtTCP1	270	315	TGACG-motif
OtTCP1	1568	1613	TGACG-motif
OtTCP1	270	315	CGTCA-motif
OtTCP1	1568	1613	CGTCA-motif
OtTCP1	956	1003	P-box
OtTCP1	543	592	ACE
OtTCP1	8	55	GCN4_motif
OtTCP1	86	132	GT1-motif
OtTCP1	657	704	GT1-motif
OtTCP1	1663	1709	GT1-motif
OtTCP2	745	791	CAT-box
OtTCP2	1617	1664	P-box
OtTCP2	1507	1552	TGACG-motif
OtTCP2	1507	1552	CGTCA-motif
OtTCP2	1201	1249	AE-box
OtTCP2	1896	1944	AE-box
OtTCP2	1509	1554	ABRE
OtTCP2	1717	1762	ABRE
OtTCP2	1206	1252	TCT-motif
OtTCP2	330	376	MBS
OtTCP2	422	468	MBS
OtTCP2	1603	1650	MYC
OtTCP2	96	142	MYC
OtTCP2	1696	1742	MYC
OtTCP2	-12	37	TCA-element
OtTCP2	187	233	GT1-motif
OtTCP2	1301	1347	GT1-motif
OtTCP2	1487	1533	GT1-motif
OtTCP5	1443	1489	Box 4
OtTCP5	651	697	CAT-box
OtTCP5	625	674	TCA-element
OtTCP5	840	886	MYC
OtTCP5	960	1006	MYC
OtTCP5	1161	1207	MYC
OtTCP5	1315	1361	MYC
OtTCP5	541	589	GA-motif
OtTCP5	136	182	TCT-motif
OtTCP5	28	73	ABRE
OtTCP5	309	357	ABRE
OtTCP5	311	356	ABRE
OtTCP5	1525	1571	ARE
OtTCP5	1674	1720	ARE
OtTCP5	1844	1890	ARE
OtTCP5	634	680	GT1-motif
OtTCP5	1636	1683	GT1-motif
OtTCP5	1637	1683	GT1-motif
OtTCP6	1395	1442	P-box
OtTCP6	1648	1695	P-box
OtTCP6	1693	1740	P-box
OtTCP6	1745	1792	P-box
OtTCP6	154	200	Box 4
OtTCP6	1354	1400	Box 4
OtTCP6	891	937	LTR
OtTCP6	355	403	O2-site
OtTCP6	450	498	O2-site
OtTCP6	1826	1875	TC-rich repeats
OtTCP6	1105	1154	ACE
OtTCP6	1901	1951	GATA-motif
OtTCP6	510	557	MYC
OtTCP6	1295	1341	MYC
OtTCP6	1155	1201	ARE
OtTCP6	1340	1386	ARE
OtTCP6	1498	1544	ARE
OtTCP6	1528	1574	ARE
OtTCP7	374	420	MYC
OtTCP7	897	943	MYC
OtTCP7	1000	1046	MYC
OtTCP7	1680	1726	MYC
OtTCP7	1859	1905	MYC
OtTCP7	805	854	TCA-element
OtTCP7	610	657	MYC
OtTCP7	612	658	TCT-motif
OtTCP7	1265	1311	TCT-motif
OtTCP7	1096	1144	GA-motif
OtTCP7	307	353	MBS
OtTCP7	529	574	ABRE
OtTCP7	16	62	ARE
OtTCP7	102	148	ARE
OtTCP7	193	239	ARE
OtTCP7	1561	1607	TGA-element
OtTCP7	1001	1050	O2-site
OtTCP7	139	184	TGACG-motif
OtTCP7	619	664	TGACG-motif
OtTCP7	650	695	TGACG-motif
OtTCP7	1629	1674	TGACG-motif
OtTCP7	667	713	Box 4
OtTCP7	139	184	CGTCA-motif
OtTCP7	619	664	CGTCA-motif
OtTCP7	650	695	CGTCA-motif
OtTCP7	1629	1674	CGTCA-motif
OtTCP7	254	301	GARE-motif
OtTCP7	691	737	GT1-motif
OtTCP8	1414	1460	MYC
OtTCP8	1636	1685	TCA-element
OtTCP8	1745	1794	TCA-element
OtTCP8	100	147	GATA-motif
OtTCP8	451	498	GATA-motif
OtTCP8	593	639	TCT-motif
OtTCP8	1431	1477	ABRE
OtTCP8	1432	1477	ABRE
OtTCP8	26	72	TGA-element
OtTCP8	128	174	ARE
OtTCP8	730	776	ARE
OtTCP8	767	813	ARE
OtTCP8	49	95	Box 4
OtTCP8	346	392	Box 4
OtTCP8	1581	1627	Box 4
OtTCP8	615	660	TGACG-motif
OtTCP8	791	836	TGACG-motif
OtTCP8	615	660	CGTCA-motif
OtTCP8	791	836	CGTCA-motif
OtTCP8	185	234	TC-rich repeats
OtTCP8	783	832	O2-site
OtTCP8	552	598	LTR
OtTCP8	261	308	GARE-motif
OtTCP8	881	928	P-box
OtTCP9	990	1036	TGA-element
OtTCP9	1131	1177	ARE
OtTCP9	197	243	MYC
OtTCP9	1438	1484	MYC
OtTCP9	1477	1523	MYC
OtTCP9	153	201	GA-motif
OtTCP9	-16	30	TCT-motif
OtTCP9	1149	1195	TCT-motif
OtTCP9	1348	1394	TCT-motif
OtTCP9	41	87	MBS
OtTCP9	878	924	CAT-box
OtTCP9	1498	1547	ACE
OtTCP9	194	239	TGACG-motif
OtTCP9	961	1007	Box 4
OtTCP9	967	1013	Box 4
OtTCP9	1426	1472	Box 4
OtTCP9	194	239	CGTCA-motif
OtTCP9	632	681	O2-site
OtTCP9	706	753	P-box
OtTCP9	287	333	GT1-motif
OtTCP9	947	993	GT1-motif
OtTCP9	1463	1509	GT1-motif
OtTCP10	801	847	ARE
OtTCP10	1403	1449	ARE
OtTCP10	1818	1864	ARE
OtTCP10	1466	1511	ABRE
OtTCP10	1939	1987	GA-motif
OtTCP10	772	818	TCT-motif
OtTCP10	612	659	GATA-motif
OtTCP10	401	447	MBS
OtTCP10	977	1024	MYC
OtTCP10	439	485	MYC
OtTCP10	505	551	MYC
OtTCP10	1043	1089	MYC
OtTCP10	1074	1120	MYC
OtTCP10	607	656	TCA-element
OtTCP10	1078	1125	GCN4_motif
OtTCP10	357	403	CAT-box
OtTCP10	876	923	P-box
OtTCP10	1550	1596	Box 4
OtTCP10	178	223	TGACG-motif
OtTCP10	390	435	TGACG-motif
OtTCP10	178	223	CGTCA-motif
OtTCP10	390	435	CGTCA-motif
OtTCP10	1155	1204	TC-rich repeats
OtTCP10	1540	1588	O2-site
OtTCP10	233	281	AE-box
OtTCP11	787	833	Box 4
OtTCP11	475	522	P-box
OtTCP11	498	545	P-box
OtTCP11	655	702	P-box
OtTCP11	585	630	ABRE
OtTCP11	1236	1281	ABRE
OtTCP11	1276	1321	ABRE
OtTCP11	1290	1335	ABRE
OtTCP11	1143	1189	ARE
OtTCP11	1175	1221	ARE
OtTCP11	618	664	TGA-element
OtTCP11	512	561	TCA-element
OtTCP11	222	268	MYC
OtTCP11	446	492	MYC
OtTCP11	1389	1435	MYC
OtTCP11	734	780	GT1-motif
OtTCP12	222	267	TGACG-motif
OtTCP12	507	552	TGACG-motif
OtTCP12	510	555	TGACG-motif
OtTCP12	222	267	CGTCA-motif
OtTCP12	507	552	CGTCA-motif
OtTCP12	510	555	CGTCA-motif
OtTCP12	219	268	O2-site
OtTCP12	1352	1399	P-box
OtTCP12	1375	1422	P-box
OtTCP12	1532	1579	P-box
OtTCP12	499	546	MYC
OtTCP12	1230	1276	MYC
OtTCP12	1323	1369	MYC
OtTCP12	1389	1438	TCA-element
OtTCP12	220	265	ABRE
OtTCP12	894	939	ABRE
OtTCP12	969	1014	ABRE
OtTCP12	1462	1507	ABRE
OtTCP12	1495	1541	TGA-element
OtTCP12	1611	1657	GT1-motif
OtTCP13	944	993	O2-site
OtTCP13	-9	40	TC-rich repeats
OtTCP13	80	129	TC-rich repeats
OtTCP13	266	315	TC-rich repeats
OtTCP13	335	384	TC-rich repeats
OtTCP13	374	423	TC-rich repeats
OtTCP13	394	443	TC-rich repeats
OtTCP13	1124	1173	TCA-element
OtTCP13	1488	1534	MYC
OtTCP13	1490	1536	MYC
OtTCP13	1552	1598	MYC
OtTCP13	1554	1600	MYC
OtTCP13	1535	1581	ABRE
OtTCP13	1536	1581	ABRE
OtTCP13	798	844	ARE
OtTCP13	622	668	GT1-motif
OtTCP13	705	751	GT1-motif
OtTCP13	725	771	GT1-motif
OtTCP14	171	217	LTR
OtTCP14	20	66	Box 4
OtTCP14	653	699	Box 4
OtTCP14	360	405	TGACG-motif
OtTCP14	363	408	TGACG-motif
OtTCP14	431	476	TGACG-motif
OtTCP14	1324	1369	TGACG-motif
OtTCP14	1421	1466	TGACG-motif
OtTCP14	1598	1643	TGACG-motif
OtTCP14	360	405	CGTCA-motif
OtTCP14	363	408	CGTCA-motif
OtTCP14	431	476	CGTCA-motif
OtTCP14	1324	1369	CGTCA-motif
OtTCP14	1421	1466	CGTCA-motif
OtTCP14	1598	1643	CGTCA-motif
OtTCP14	1087	1134	P-box
OtTCP14	1497	1543	CAT-box
OtTCP14	1074	1121	GCN4_motif
OtTCP14	58	104	MYC
OtTCP14	303	349	MYC
OtTCP14	366	412	MYC
OtTCP14	580	626	MYC
OtTCP14	746	792	MYC
OtTCP14	1772	1818	MYC
OtTCP14	423	473	ABRE
OtTCP14	1272	1317	ABRE
OtTCP14	1220	1266	ARE
OtTCP14	1639	1685	ARE

## Sheet: Table S6
Table S6. Expression profiles （FPKM values） of 14 OtTCPs in various tissues (Roots, Buds, Stems, Leaves and Flower).
Gene ID	Root	Bud	Stem	Leaf	Flowers
OpTCP9	0	9	28	1	11
OpTCP2	0	9	3	1	5
OpTCP5	933	554	696	421	487
OpTCP10	1002	138	1583	2487	320
OpTCP8	2	6	212	56	31
OpTCP11	36	42	196	55	101
OpTCP3	0	2	11	30	2
OpTCP14	89	19	81	1	68
OpTCP1	142	52	465	570	78
OpTCP13	53	6	120	7	3
OpTCP6	12	1026	356	1584	713
OpTCP4	0	5	11	0	55
OpTCP12	9	12	55	20	23
OpTCP7	322	13	281	155	14

## Sheet: Table S7
TableS7. Expression profiles （FPKM values）of 14 OtTCPs under drought conditions (Roots and Leaves).
Bioproject	PRJNA400848		PRJNA437359
Gene ID	L-0h	L-3.5h	R-0h	R-9h
OpTCP9	5.33333	2.66667	0	0
OpTCP2	1.66667	1	3.33333	1
OpTCP5	615	373	651.667	253
OpTCP10	865.667	326.667	699.333	204
OpTCP8	80	10.3333	0	0
OpTCP11	69.3333	19.6667	4.66667	2.66667
OpTCP3	3	0.666667	0	0
OpTCP14	11.6667	0	1	0
OpTCP1	154.667	52.6667	190.667	19.6667
OpTCP13	62	54	36.3333	0
OpTCP6	1805	692	48.3333	21
OpTCP4	1.66667	0	6.66667	5
OpTCP12	37.6667	10.3333	1.33333	0.666667
OpTCP7	153	66.3333	160	25

## Sheet: Table S8
Table S8. Expression profiles（FPKM values） of 14 OtTCPs under salt stress conditions (different concentrations and times).
Gene ID	T-CK	T-100	T-300	T-500	T-0h	T-6h	T-24	T-48
OpTCP9	1.33333	0.666667	0.666667	2	2.33333	3	1	5.33333
OpTCP2	0.666667	4.66667	3.33333	2.33333	12.3333	1.33333	2.33333	4.66667
OpTCP5	433	403	548.667	549	461	504.667	588.333	876
OpTCP10	1035.67	704	467.667	294	464.667	602.333	357.667	364.333
OpTCP8	14	14	12	19	38.6667	5.33333	7.33333	12
OpTCP11	9.33333	5.66667	9.33333	2.33333	2.33333	2.66667	2.33333	6
OpTCP3	1.33333	0.666667	0.333333	1	4.33333	1.66667	0.333333	5
OpTCP14	0	0.333333	0	0.333333	0	0	0	2.33333
OpTCP1	297.667	332.667	220	291.667	298.667	312.333	231	187.667
OpTCP13	37	38	48.6667	67	35.3333	199.333	42	105.667
OpTCP6	1850.33	1262	893	324.333	1475.33	778.333	419.333	441.667
OpTCP4	3	2	0	1	0.333333	1.33333	0	0
OpTCP12	3	1.33333	2.33333	1	0.666667	0.333333	0	1
OpTCP7	228.333	186.667	63.3333	58	71.3333	109.333	35	95
